# Supplementary material
Source: bioRxiv or medRxiv preprint supplement (https://www.biorxiv.org/highwire/filestream/1717/field_highwire_adjunct_files/11/006932-2.pdf)

**A**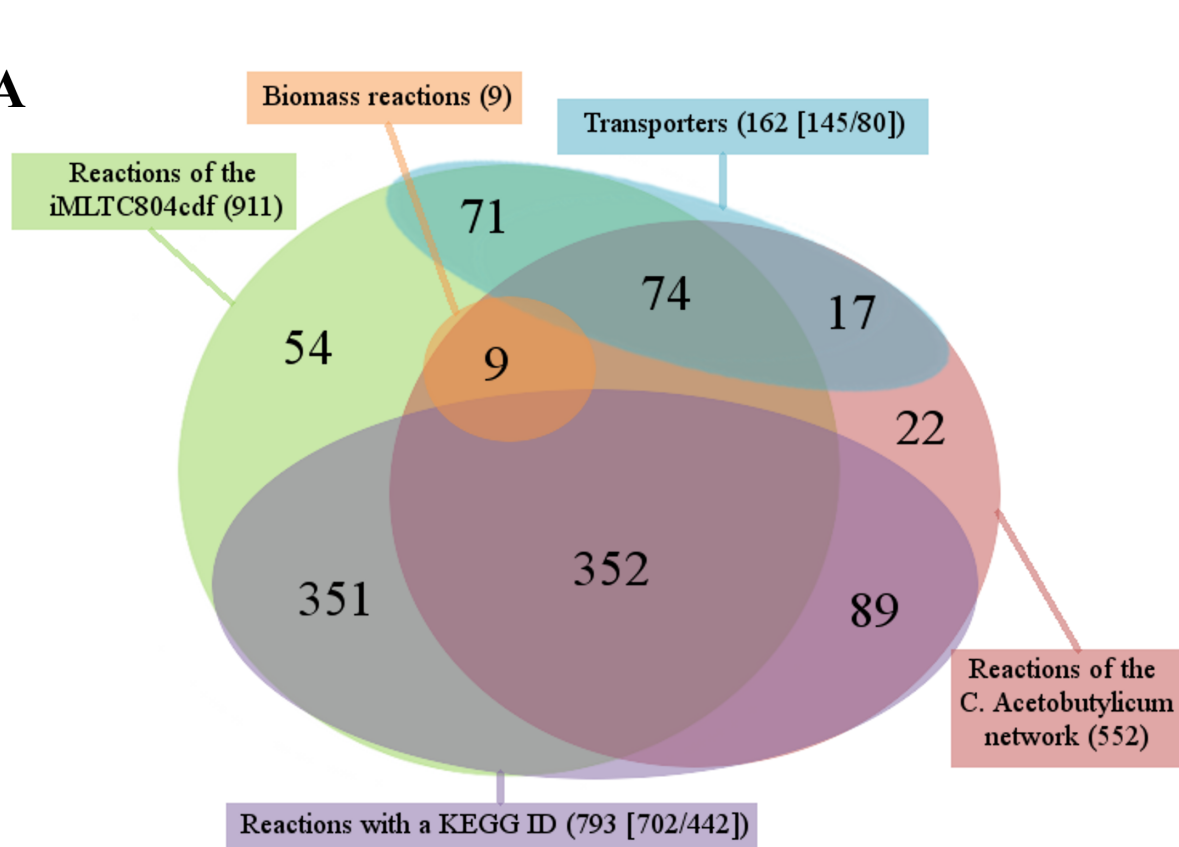**B**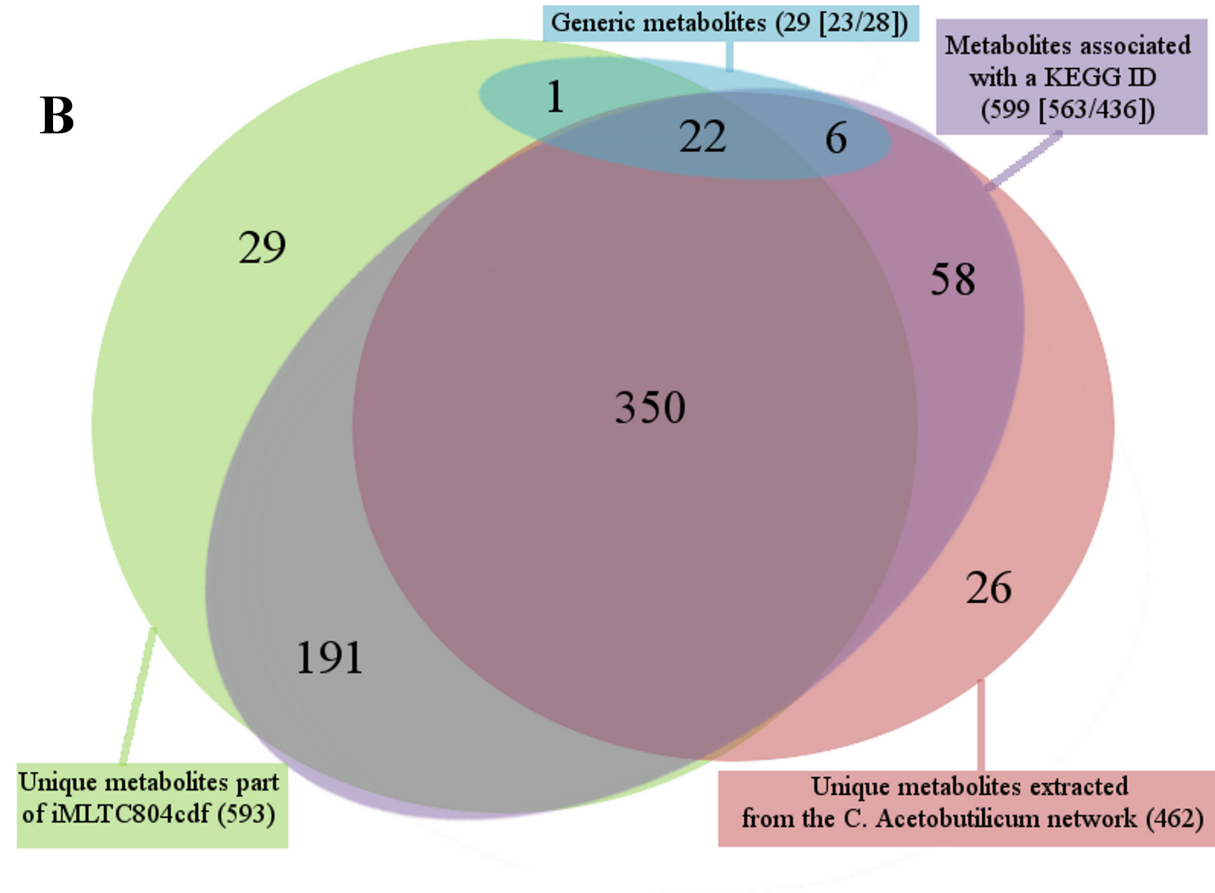**C**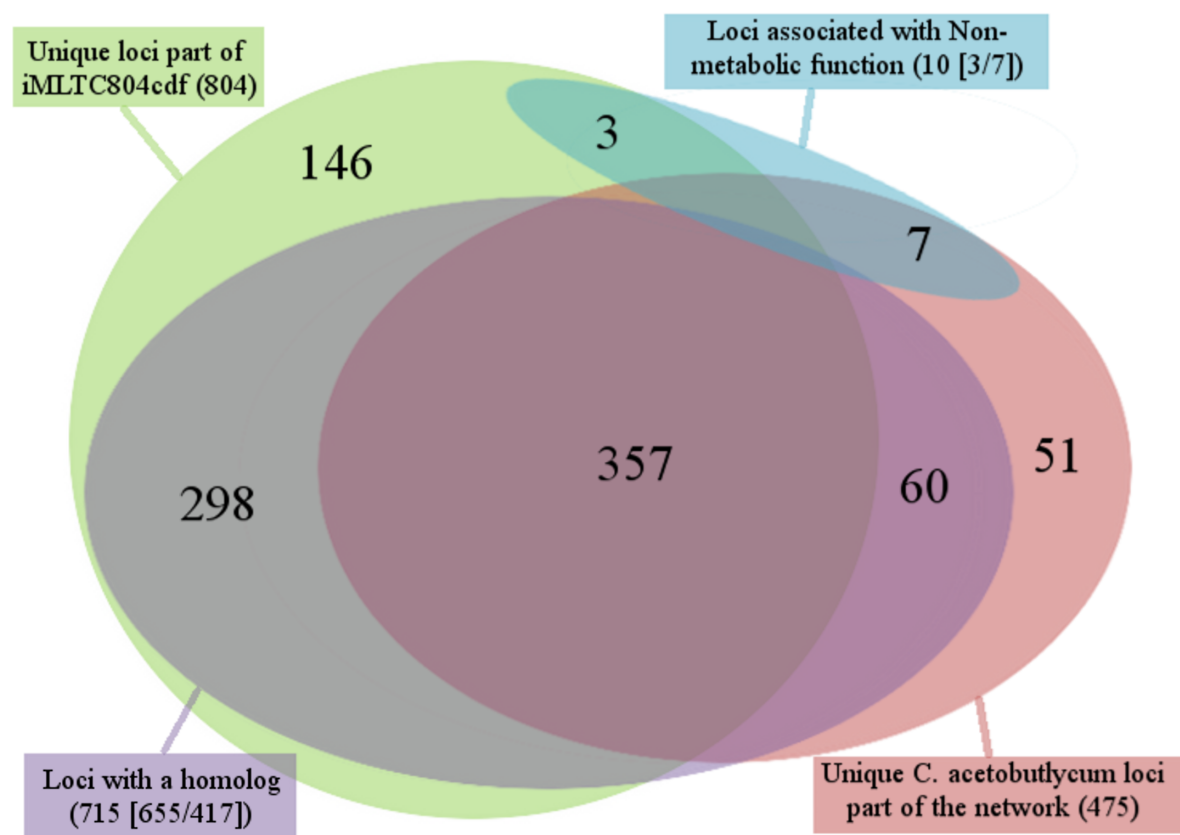

Supplement: Supplementary file [file 006932-2.pdf]
